# Supplementary material
Source: PubMed Central journal article supplement (PMC3518395)

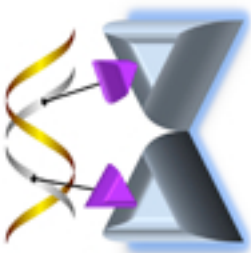

Supplement: NIHMS425480-supplement-2.pdf [file NIHMS425480-supplement-2.pdf]
